# Supplementary material
Source: MDPI journal article supplement (https://www.mdpi.com/2077-0472/12/5/579)
Supplement: s1 [file s1]

# Supplementary Materials: Hyperspectral-based Classification of Managed Permanent Grassland With Multilayer Perceptrons: Influence of Spectral Band Count and Spectral Regions on Model Performance

Roland Britz <sup>1,2</sup> , Norbert Barta <sup>2</sup> , Andreas Klingler <sup>3</sup> , Andreas Schaumberger <sup>3</sup> , Alexander Bauer <sup>2</sup> , Erich M. Pötsch <sup>3</sup> , Andreas Gronauer <sup>2</sup>  and Viktoria Motsch <sup>2,\*</sup> 

**Table S1.** Mean classification accuracy (MCA) and weighted F1 score (F1) values based on the different variants in different approaches. Approaches: reference variants (Ref.), ANOVA approach (ANOVA), peak approach (Peak), and reduction approach (Red.). Variants with the postfix “-O” were processed without Savitzky–Golay filtering and derivation. Statistical significance was calculated for MCA and F1 in a joint analysis ( $\alpha = 5\%$ ). Significance letters are given in alphabetical ranges. Upper case letters follow lower case letters. All letters enclosed in the ranges belong to the same significance group. Different letters denote significant differences. Values with standard deviation, 5-fold cross-validated.

| Approach | Variant             | Input size | MCA [%]    | Stat. sig. MCA | F1 [%]     | Stat. sig. F1 |
|----------|---------------------|------------|------------|----------------|------------|---------------|
| Ref.     | Baseline            | 191        | 86.1 ± 0.4 | a              | 86.1 ± 0.4 | a             |
| Ref.     | Baseline-O          | 192        | 81.8 ± 1.3 | g - k          | 82.0 ± 1.2 | f - j         |
| Ref.     | Even bands          | 96         | 82.2 ± 0.4 | e - i          | 82.2 ± 0.4 | e - i         |
| Ref.     | Odd bands           | 95         | 81.5 ± 0.3 | g - l          | 81.5 ± 0.3 | g - l         |
| Ref.     | DCS                 | 9          | 62.8 ± 2.8 | D - E          | 64.3 ± 2.2 | B - D         |
| Ref.     | DCS-O               | 10         | 76.2 ± 1.3 | q - u          | 77.0 ± 1.1 | p - s         |
| Ref.     | Sentinel            | 9          | 64.9 ± 0.7 | B - C          | 66.1 ± 0.6 | B             |
| Ref.     | Sentinel-O          | 10         | 69.6 ± 1.2 | z - A          | 70.6 ± 0.8 | z - A         |
| ANOVA    | D ≥ 33 / 36         | 144        | 84.6 ± 0.1 | a - d          | 84.7 ± 0.2 | a - c         |
| ANOVA    | D ≥ 34 / 36         | 119        | 84.0 ± 0.6 | b - f          | 84.1 ± 0.5 | b - e         |
| ANOVA    | D ≥ 35 / 36         | 87         | 82.5 ± 0.5 | e - h          | 82.6 ± 0.5 | d - g         |
| ANOVA    | D = 36 / 36         | 34         | 74.9 ± 0.2 | t - x          | 75.0 ± 0.2 | s - x         |
| ANOVA    | D = 36 / 36, C ≤ 95 | 31         | 73.9 ± 0.3 | v - x          | 74.3 ± 0.2 | u - x         |
| ANOVA    | D = 36 / 36, C ≤ 85 | 29         | 69.3 ± 0.7 | z - A          | 70.1 ± 0.6 | z - A         |
| ANOVA    | D = 36 / 36, C ≤ 75 | 21         | 62.7 ± 0.6 | D - E          | 63.6 ± 0.6 | C - D         |
| ANOVA    | D = 36 / 36, C ≤ 65 | 17         | 60.1 ± 0.5 | F - G          | 61.2 ± 0.4 | E - F         |
| ANOVA    | D = 36 / 36, C ≤ 55 | 12         | 54.1 ± 1.0 | I              | 55.1 ± 1.0 | I             |
| ANOVA    | D = 36 / 36, C ≤ 45 | 10         | 50.0 ± 1.3 | J              | 50.0 ± 0.9 | J             |
| Peak     | Top 30 per class    | 103        | 80.3 ± 0.5 | i - m          | 80.5 ± 0.4 | h - m         |
| Peak     | Top 25 per class    | 95         | 80.1 ± 0.3 | j - m          | 80.2 ± 0.3 | i - m         |
| Peak     | Top 20 per class    | 83         | 79.4 ± 0.5 | m - o          | 79.5 ± 0.4 | l - o         |
| Peak     | Top 15 per class    | 63         | 78.6 ± 0.6 | m - p          | 78.5 ± 0.5 | m - p         |
| Peak     | Top 10 per class    | 42         | 76.4 ± 0.3 | q - t          | 76.7 ± 0.2 | p - t         |
| Peak     | Top 7 per class     | 30         | 73.5 ± 0.5 | w - x          | 73.6 ± 0.4 | w - x         |
| Peak     | Top 5 per class     | 22         | 70.4 ± 0.5 | z - A          | 71.2 ± 0.5 | y - z         |
| Peak     | Top 3 per class     | 14         | 62.4 ± 0.8 | D - E          | 63.9 ± 0.5 | C - D         |
| Peak     | Ignoring classes    | 22         | 57.9 ± 0.7 | H              | 58.9 ± 0.5 | G - H         |
| Red.     | R1                  | 152        | 85.2 ± 0.6 | a - b          | 85.3 ± 0.6 | a - b         |
| Red.     | R2                  | 121        | 84.8 ± 0.5 | a - c          | 84.8 ± 0.6 | a - c         |
| Red.     | R3                  | 96         | 83.9 ± 0.7 | b - f          | 84.0 ± 0.6 | b - f         |
| Red.     | R4                  | 76         | 83.2 ± 0.7 | c - g          | 83.2 ± 0.5 | c - g         |
| Red.     | R5                  | 60         | 81.4 ± 0.7 | g - l          | 81.6 ± 0.7 | g - k         |
| Red.     | R6                  | 48         | 79.9 ± 0.6 | k - n          | 80.1 ± 0.5 | j - m         |
| Red.     | R7                  | 38         | 77.8 ± 0.6 | o - r          | 78.0 ± 0.4 | n - q         |
| Red.     | R8                  | 30         | 75.4 ± 0.7 | s - w          | 75.9 ± 0.5 | r - v         |
| Red.     | R9                  | 24         | 73.1 ± 1.0 | x - y          | 73.6 ± 1.0 | w - x         |
| Red.     | R10                 | 19         | 68.7 ± 0.8 | A              | 69.3 ± 0.6 | z - A         |
| Red.     | R11                 | 15         | 64.4 ± 0.5 | B - D          | 65.3 ± 0.4 | B - C         |
| Red.     | R12                 | 12         | 58.9 ± 0.9 | G - H          | 60.0 ± 0.8 | F - G         |
| Red.     | R13                 | 9          | 54.8 ± 0.3 | I              | 55.4 ± 0.6 | I             |

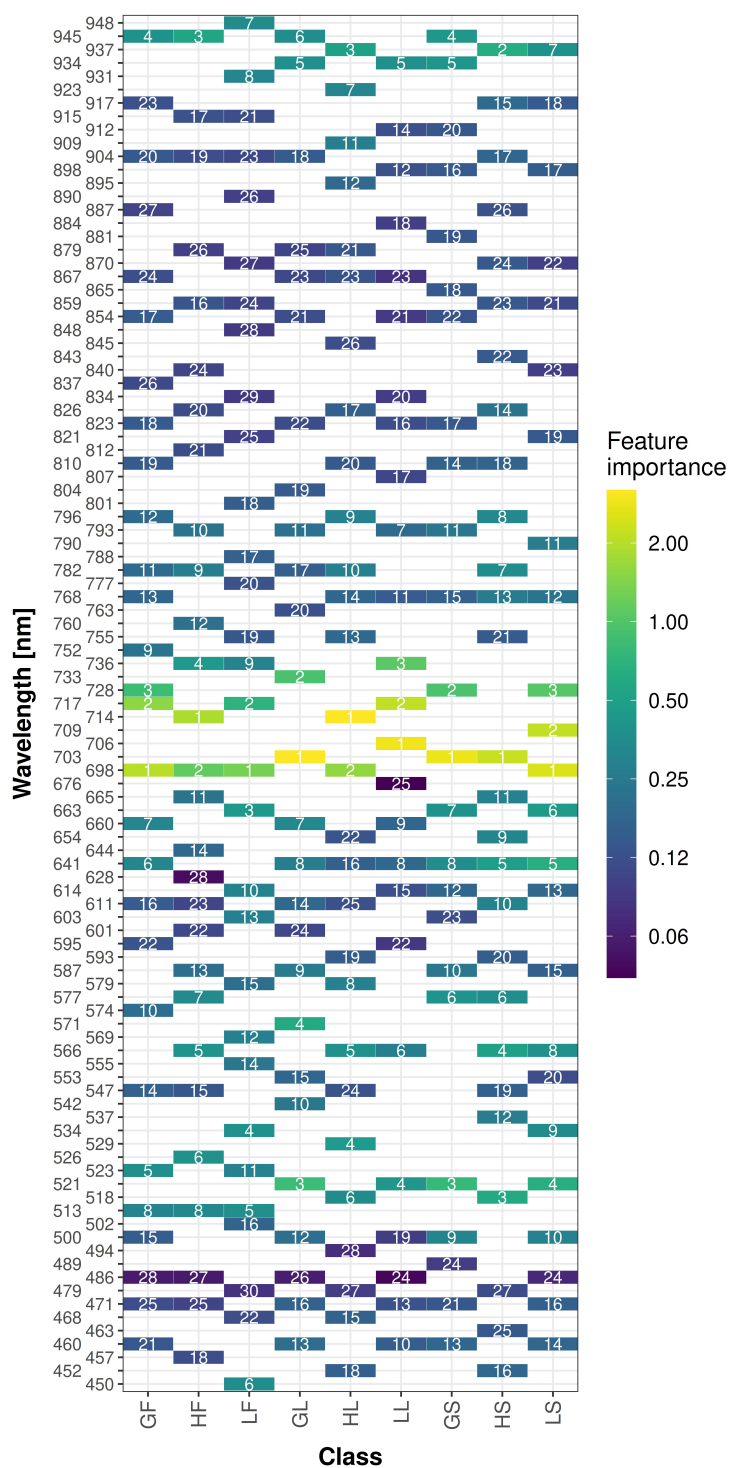

**Figure S1.** Feature importance of peaks selected via the peak approach based on different classes. First character: G = grass, H = herb, L = legume. Second character: F = flower, L = leaf, S = stem. Numbers in the tiles denote the peak height ranking for each class (lowest number = highest peak).

**Table S2.** Classification accuracy for flowers, leaves, and stems based on different species groups, variants, and approaches. Approaches: reference variants (Ref.), ANOVA approach (ANOVA), peak approach (Peak), and reduction approach (Red.). Variants with the postfix “-O” were processed without Savitzky–Golay filtering and derivation. Statistical significance was calculated individually for flowers, leaves, and stems ( $\alpha = 5\%$ ). Significance letters are given in alphabetical ranges. Upper case letters follow lower case letters. All letters enclosed in the ranges belong to the same significance group. Different letters denote significant differences. Values with standard deviation, 5-fold cross-validated.

| Approach | Variant             | Input size | Species group | Flower       |            | Leaf         |            | Stem         |            |
|----------|---------------------|------------|---------------|--------------|------------|--------------|------------|--------------|------------|
|          |                     |            |               | Accuracy [%] | Stat. sig. | Accuracy [%] | Stat. sig. | Accuracy [%] | Stat. sig. |
| Ref.     | Baseline            | 191        | Grass         | 86.2 ± 4.5   | a - r      | 88.9 ± 2.1   | a - f      | 72.5 ± 4.9   | b - q      |
| Ref.     | Baseline            | 191        | Herb          | 84.6 ± 1.5   | a - u      | 89.0 ± 1.6   | a - e      | 60.3 ± 6.6   | m - E      |
| Ref.     | Baseline            | 191        | Legume        | 93.7 ± 1.9   | a - c      | 91.0 ± 2.3   | a - b      | 88.9 ± 3.5   | a          |
| Ref.     | Baseline-O          | 192        | Grass         | 87.3 ± 5.1   | a - o      | 83.9 ± 4.3   | a - p      | 65.6 ± 4.5   | j - y      |
| Ref.     | Baseline-O          | 192        | Herb          | 82.9 ± 2.8   | d - w      | 88.8 ± 3.7   | a - f      | 60.0 ± 11.3  | m - F      |
| Ref.     | Baseline-O          | 192        | Legume        | 92.5 ± 2.9   | a - f      | 87.9 ± 2.9   | a - g      | 78.5 ± 3.3   | a - l      |
| Ref.     | Even bands          | 96         | Grass         | 83.6 ± 2.6   | c - v      | 84.9 ± 3.1   | a - o      | 65.2 ± 5.5   | k - y      |
| Ref.     | Even bands          | 96         | Herb          | 76.8 ± 2.1   | q - E      | 84.2 ± 3.7   | a - p      | 56.6 ± 7.2   | r - J      |
| Ref.     | Even bands          | 96         | Legume        | 92.9 ± 1.3   | a - d      | 89.2 ± 2.2   | a - e      | 84.3 ± 3.4   | a - f      |
| Ref.     | Odd bands           | 95         | Grass         | 83.8 ± 2.2   | b - v      | 83.8 ± 1.9   | a - p      | 66.2 ± 5.5   | j - y      |
| Ref.     | Odd bands           | 95         | Herb          | 74.5 ± 4.0   | u - H      | 77.4 ± 5.0   | i - z      | 54.2 ± 5.1   | v - L      |
| Ref.     | Odd bands           | 95         | Legume        | 92.6 ± 1.8   | a - e      | 89.2 ± 1.0   | a - e      | 82.5 ± 1.9   | a - h      |
| Ref.     | DCS                 | 9          | Grass         | 64.5 ± 8.0   | H - P      | 60.7 ± 8.3   | G - M      | 49.4 ± 8.1   | z - O      |
| Ref.     | DCS                 | 9          | Herb          | 71.0 ± 4.7   | A - J      | 80.6 ± 6.0   | d - u      | 46.3 ± 5.4   | C - P      |
| Ref.     | DCS                 | 9          | Legume        | 83.9 ± 3.0   | b - v      | 76.6 ± 2.9   | l - B      | 54.8 ± 9.3   | v - L      |
| Ref.     | DCS-O               | 10         | Grass         | 79.3 ± 3.1   | m - C      | 77.9 ± 4.2   | h - z      | 65.6 ± 2.7   | j - y      |
| Ref.     | DCS-O               | 10         | Herb          | 77.6 ± 2.4   | o - E      | 85.3 ± 4.9   | a - n      | 52.1 ± 8.6   | x - O      |
| Ref.     | DCS-O               | 10         | Legume        | 88.3 ± 2.9   | a - n      | 81.5 ± 2.4   | b - t      | 69.6 ± 3.2   | d - v      |
| Ref.     | Sentinel            | 9          | Grass         | 66.3 ± 4.0   | F - O      | 65.2 ± 2.1   | D - K      | 56.5 ± 5.0   | r - J      |
| Ref.     | Sentinel            | 9          | Herb          | 72.1 ± 4.8   | y - I      | 80.3 ± 7.7   | d - u      | 48.0 ± 14.3  | B - O      |
| Ref.     | Sentinel            | 9          | Legume        | 75.6 ± 4.3   | t - G      | 75.2 ± 4.1   | o - C      | 54.1 ± 5.0   | v - M      |
| Ref.     | Sentinel-O          | 10         | Grass         | 71.3 ± 3.0   | z - J      | 68.6 ± 4.1   | y - I      | 59.0 ± 3.8   | o - G      |
| Ref.     | Sentinel-O          | 10         | Herb          | 77.0 ± 4.3   | p - E      | 84.3 ± 3.0   | a - p      | 46.1 ± 9.1   | D - P      |
| Ref.     | Sentinel-O          | 10         | Legume        | 81.1 ± 3.5   | h - A      | 79.7 ± 2.6   | e - v      | 65.4 ± 4.7   | k - y      |
| ANOVA    | D ≥ 33 / 36         | 144        | Grass         | 85.9 ± 2.1   | a - s      | 86.1 ± 1.7   | a - l      | 72.1 ± 4.7   | b - r      |
| ANOVA    | D ≥ 33 / 36         | 144        | Herb          | 82.6 ± 3.5   | e - x      | 89.2 ± 1.7   | a - e      | 58.8 ± 8.0   | o - G      |
| ANOVA    | D ≥ 33 / 36         | 144        | Legume        | 93.9 ± 2.7   | a - b      | 89.9 ± 1.0   | a - d      | 86.1 ± 1.3   | a - c      |
| ANOVA    | D ≥ 34 / 36         | 119        | Grass         | 84.6 ± 1.9   | a - u      | 85.4 ± 2.2   | a - m      | 71.8 ± 2.1   | b - r      |
| ANOVA    | D ≥ 34 / 36         | 119        | Herb          | 79.4 ± 2.3   | l - C      | 86.1 ± 2.6   | a - l      | 58.7 ± 5.4   | o - G      |
| ANOVA    | D ≥ 34 / 36         | 119        | Legume        | 93.6 ± 2.1   | a - c      | 89.5 ± 0.5   | a - d      | 86.2 ± 2.1   | a - c      |
| ANOVA    | D ≥ 35 / 36         | 87         | Grass         | 86.3 ± 2.8   | a - r      | 84.7 ± 2.4   | a - o      | 65.1 ± 5.2   | k - z      |
| ANOVA    | D ≥ 35 / 36         | 87         | Herb          | 79.8 ± 4.3   | k - B      | 86.0 ± 4.5   | a - l      | 56.6 ± 6.3   | r - J      |
| ANOVA    | D ≥ 35 / 36         | 87         | Legume        | 93.5 ± 1.5   | a - c      | 87.5 ± 1.9   | a - h      | 84.7 ± 2.3   | a - e      |
| ANOVA    | D = 36 / 36         | 34         | Grass         | 80.0 ± 2.6   | j - B      | 77.8 ± 3.9   | h - z      | 56.4 ± 4.2   | r - J      |
| ANOVA    | D = 36 / 36         | 34         | Herb          | 58.8 ± 4.5   | M - S      | 72.3 ± 3.4   | s - E      | 44.4 ± 4.4   | F - P      |
| ANOVA    | D = 36 / 36         | 34         | Legume        | 88.6 ± 2.5   | a - n      | 81.6 ± 2.0   | a - t      | 74.9 ± 3.9   | a - n      |
| ANOVA    | D = 36 / 36, C ≤ 95 | 31         | Grass         | 76.2 ± 2.8   | r - F      | 77.6 ± 2.3   | i - z      | 58.2 ± 4.9   | o - H      |
| ANOVA    | D = 36 / 36, C ≤ 95 | 31         | Herb          | 60.4 ± 4.4   | K - S      | 77.7 ± 1.4   | h - z      | 46.2 ± 5.7   | C - P      |
| ANOVA    | D = 36 / 36, C ≤ 95 | 31         | Legume        | 88.4 ± 1.3   | a - n      | 79.1 ± 2.2   | f - w      | 70.8 ± 2.0   | c - t      |
| ANOVA    | D = 36 / 36, C ≤ 85 | 29         | Grass         | 72.7 ± 2.8   | x - I      | 67.1 ± 1.7   | B - J      | 57.0 ± 2.1   | p - J      |
| ANOVA    | D = 36 / 36, C ≤ 85 | 29         | Herb          | 58.7 ± 6.3   | M - S      | 69.8 ± 4.9   | w - G      | 48.9 ± 9.6   | A - O      |
| ANOVA    | D = 36 / 36, C ≤ 85 | 29         | Legume        | 87.0 ± 1.4   | a - p      | 78.3 ± 1.7   | g - y      | 71.2 ± 3.5   | b - s      |
| ANOVA    | D = 36 / 36, C ≤ 75 | 21         | Grass         | 68.2 ± 5.3   | E - N      | 58.3 ± 4.2   | J - M      | 51.8 ± 6.2   | x - O      |
| ANOVA    | D = 36 / 36, C ≤ 75 | 21         | Herb          | 50.4 ± 4.6   | S - V      | 64.7 ± 4.6   | E - L      | 39.2 ± 7.5   | L - P      |
| ANOVA    | D = 36 / 36, C ≤ 75 | 21         | Legume        | 82.9 ± 3.1   | d - x      | 73.1 ± 2.0   | r - E      | 63.9 ± 3.0   | l - A      |
| ANOVA    | D = 36 / 36, C ≤ 65 | 17         | Grass         | 65.9 ± 2.8   | G - P      | 55.1 ± 2.1   | L - N      | 51.5 ± 5.0   | x - O      |
| ANOVA    | D = 36 / 36, C ≤ 65 | 17         | Herb          | 44.5 ± 6.1   | V - W      | 61.7 ± 6.2   | F - M      | 45.6 ± 8.8   | D - P      |
| ANOVA    | D = 36 / 36, C ≤ 65 | 17         | Legume        | 79.2 ± 2.0   | m - C      | 70.0 ± 2.1   | v - G      | 59.7 ± 3.2   | m - F      |
| ANOVA    | D = 36 / 36, C ≤ 55 | 12         | Grass         | 57.9 ± 1.6   | O - T      | 48.3 ± 3.6   | N          | 43.8 ± 3.2   | G - P      |
| ANOVA    | D = 36 / 36, C ≤ 55 | 12         | Herb          | 36.0 ± 5.4   | W          | 54.5 ± 3.1   | M - N      | 39.8 ± 6.8   | K - P      |
| ANOVA    | D = 36 / 36, C ≤ 55 | 12         | Legume        | 74.2 ± 2.7   | v - H      | 65.6 ± 4.7   | C - K      | 58.9 ± 2.6   | o - G      |
| ANOVA    | D = 36 / 36, C ≤ 45 | 10         | Grass         | 52.1 ± 3.0   | R - V      | 52.7 ± 4.9   | M - N      | 31.9 ± 2.4   | P - Q      |
| ANOVA    | D = 36 / 36, C ≤ 45 | 10         | Herb          | 15.7 ± 4.9   | X          | 34.2 ± 5.4   | O          | 20.8 ± 4.1   | Q          |

|       |                     |     |        |            |       |             |       |             |       |
|-------|---------------------|-----|--------|------------|-------|-------------|-------|-------------|-------|
| ANOVA | D = 36 / 36, C ≤ 45 | 10  | Legume | 73.9 ± 4.7 | v - H | 56.2 ± 3.7  | K - N | 52.2 ± 4.4  | x - O |
| Peak  | Top 30 per class    | 103 | Grass  | 81.3 ± 2.9 | h - z | 82.6 ± 2.7  | a - r | 66.6 ± 3.7  | i - y |
| Peak  | Top 30 per class    | 103 | Herb   | 75.8 ± 2.7 | s - G | 82.9 ± 3.1  | a - r | 55.1 ± 7.8  | t - K |
| Peak  | Top 30 per class    | 103 | Legume | 90.9 ± 2.5 | a - h | 85.9 ± 2.2  | a - l | 81.1 ± 1.5  | a - j |
| Peak  | Top 25 per class    | 95  | Grass  | 80.9 ± 1.4 | h - A | 82.1 ± 1.7  | a - s | 65.6 ± 3.7  | j - y |
| Peak  | Top 25 per class    | 95  | Herb   | 73.1 ± 4.2 | w - H | 81.1 ± 4.4  | c - t | 53.1 ± 11.7 | x - N |
| Peak  | Top 25 per class    | 95  | Legume | 92.0 ± 2.3 | a - g | 86.3 ± 1.3  | a - l | 82.7 ± 3.8  | a - g |
| Peak  | Top 20 per class    | 83  | Grass  | 80.5 ± 2.1 | i - A | 80.7 ± 3.8  | c - u | 65.5 ± 4.3  | j - y |
| Peak  | Top 20 per class    | 83  | Herb   | 73.9 ± 3.4 | v - H | 80.5 ± 4.5  | d - u | 49.0 ± 2.4  | A - O |
| Peak  | Top 20 per class    | 83  | Legume | 90.0 ± 2.2 | a - j | 86.7 ± 1.4  | a - k | 82.3 ± 2.9  | a - i |
| Peak  | Top 15 per class    | 63  | Grass  | 80.3 ± 3.2 | j - A | 82.7 ± 3.7  | a - r | 59.2 ± 6.4  | n - G |
| Peak  | Top 15 per class    | 63  | Herb   | 71.7 ± 1.1 | z - J | 76.7 ± 5.5  | l - B | 48.7 ± 4.8  | A - O |
| Peak  | Top 15 per class    | 63  | Legume | 89.9 ± 2.5 | a - k | 86.4 ± 2.8  | a - l | 79.2 ± 3.5  | a - l |
| Peak  | Top 10 per class    | 42  | Grass  | 78.9 ± 2.8 | n - D | 78.9 ± 2.5  | g - x | 61.1 ± 3.5  | m - D |
| Peak  | Top 10 per class    | 42  | Herb   | 65.9 ± 3.8 | G - P | 75.7 ± 6.3  | m - B | 47.0 ± 6.6  | B - P |
| Peak  | Top 10 per class    | 42  | Legume | 89.2 ± 1.1 | a - m | 84.1 ± 3.0  | a - p | 75.2 ± 4.8  | a - m |
| Peak  | Top 7 per class     | 30  | Grass  | 75.1 ± 3.4 | u - G | 76.9 ± 1.7  | l - B | 55.6 ± 4.4  | s - J |
| Peak  | Top 7 per class     | 30  | Herb   | 58.7 ± 5.8 | M - S | 71.0 ± 4.8  | u - F | 41.6 ± 7.0  | J - P |
| Peak  | Top 7 per class     | 30  | Legume | 86.6 ± 2.1 | a - q | 82.7 ± 1.4  | a - r | 73.1 ± 4.1  | a - o |
| Peak  | Top 5 per class     | 22  | Grass  | 73.7 ± 4.3 | v - H | 71.9 ± 1.5  | t - E | 55.6 ± 2.9  | s - J |
| Peak  | Top 5 per class     | 22  | Herb   | 59.8 ± 7.4 | L - S | 77.0 ± 2.2  | k - A | 45.9 ± 6.3  | D - P |
| Peak  | Top 5 per class     | 22  | Legume | 82.9 ± 2.3 | d - w | 77.7 ± 1.7  | h - z | 68.9 ± 5.4  | f - w |
| Peak  | Top 3 per class     | 14  | Grass  | 65.9 ± 4.8 | G - P | 65.5 ± 2.6  | C - K | 48.8 ± 4.4  | A - O |
| Peak  | Top 3 per class     | 14  | Herb   | 52.9 ± 4.9 | Q - V | 78.0 ± 5.5  | h - z | 42.4 ± 9.1  | H - P |
| Peak  | Top 3 per class     | 14  | Legume | 71.2 ± 2.9 | z - J | 69.9 ± 5.1  | v - G | 53.6 ± 4.5  | w - N |
| Peak  | Ignoring classes    | 22  | Grass  | 56.0 ± 2.4 | P - U | 59.2 ± 2.3  | I - M | 47.0 ± 4.7  | B - P |
| Peak  | Ignoring classes    | 22  | Herb   | 45.1 ± 8.0 | V - W | 67.4 ± 4.6  | A - J | 42.1 ± 6.6  | I - P |
| Peak  | Ignoring classes    | 22  | Legume | 79.1 ± 1.9 | m - C | 67.3 ± 2.8  | A - J | 49.1 ± 4.7  | A - O |
| Red.  | R1                  | 152 | Grass  | 86.2 ± 2.0 | a - r | 86.9 ± 1.5  | a - j | 73.2 ± 3.7  | a - o |
| Red.  | R1                  | 152 | Herb   | 85.6 ± 2.4 | a - t | 85.0 ± 3.0  | a - n | 62.0 ± 5.5  | m - C |
| Red.  | R1                  | 152 | Legume | 93.6 ± 2.5 | a - c | 91.3 ± 1.5  | a     | 86.3 ± 1.3  | a - c |
| Red.  | R2                  | 121 | Grass  | 86.5 ± 2.7 | a - q | 87.1 ± 1.4  | a - i | 69.2 ± 6.2  | e - w |
| Red.  | R2                  | 121 | Herb   | 82.0 ± 4.7 | g - y | 86.0 ± 2.1  | a - l | 62.5 ± 6.8  | m - B |
| Red.  | R2                  | 121 | Legume | 94.3 ± 1.2 | a     | 91.2 ± 1.3  | a - b | 86.7 ± 2.5  | a - b |
| Red.  | R3                  | 96  | Grass  | 84.4 ± 4.2 | a - u | 85.0 ± 1.9  | a - n | 72.6 ± 3.2  | b - p |
| Red.  | R3                  | 96  | Herb   | 84.6 ± 2.1 | a - u | 85.0 ± 2.3  | a - o | 56.5 ± 7.9  | r - J |
| Red.  | R3                  | 96  | Legume | 93.9 ± 0.5 | a - b | 90.5 ± 2.2  | a - c | 84.9 ± 2.5  | a - e |
| Red.  | R4                  | 76  | Grass  | 84.5 ± 2.0 | a - u | 85.8 ± 3.6  | a - l | 67.1 ± 5.6  | g - x |
| Red.  | R4                  | 76  | Herb   | 81.3 ± 3.6 | h - z | 83.5 ± 2.9  | a - p | 57.8 ± 3.8  | o - I |
| Red.  | R4                  | 76  | Legume | 92.4 ± 1.6 | a - f | 90.0 ± 1.6  | a - d | 85.2 ± 1.2  | a - d |
| Red.  | R5                  | 60  | Grass  | 82.0 ± 2.8 | g - y | 83.4 ± 2.3  | a - p | 67.0 ± 2.1  | h - x |
| Red.  | R5                  | 60  | Herb   | 79.2 ± 2.9 | m - C | 82.9 ± 3.8  | a - r | 54.0 ± 4.9  | v - M |
| Red.  | R5                  | 60  | Legume | 92.1 ± 2.7 | a - g | 88.0 ± 1.1  | a - g | 84.1 ± 2.5  | a - f |
| Red.  | R6                  | 48  | Grass  | 82.3 ± 1.7 | f - x | 81.8 ± 3.4  | a - s | 64.4 ± 4.5  | l - A |
| Red.  | R6                  | 48  | Herb   | 78.0 ± 3.3 | o - E | 82.3 ± 1.8  | a - r | 56.7 ± 7.6  | q - J |
| Red.  | R6                  | 48  | Legume | 90.6 ± 1.7 | a - i | 86.1 ± 2.9  | a - l | 80.8 ± 4.0  | a - k |
| Red.  | R7                  | 38  | Grass  | 78.7 ± 3.5 | n - D | 81.7 ± 1.8  | a - t | 58.7 ± 3.1  | o - G |
| Red.  | R7                  | 38  | Herb   | 74.9 ± 3.3 | u - G | 83.9 ± 2.1  | a - p | 53.9 ± 9.6  | v - N |
| Red.  | R7                  | 38  | Legume | 89.5 ± 2.2 | a - l | 83.1 ± 2.3  | a - q | 79.2 ± 5.5  | a - l |
| Red.  | R8                  | 30  | Grass  | 76.2 ± 1.0 | r - F | 79.1 ± 2.3  | f - w | 58.5 ± 3.7  | o - G |
| Red.  | R8                  | 30  | Herb   | 69.5 ± 2.2 | C - L | 80.8 ± 3.7  | c - u | 55.0 ± 6.8  | u - K |
| Red.  | R8                  | 30  | Legume | 87.4 ± 1.5 | a - o | 82.2 ± 1.8  | a - r | 73.4 ± 5.3  | a - o |
| Red.  | R9                  | 24  | Grass  | 75.5 ± 1.7 | t - G | 77.0 ± 1.9  | k - A | 54.2 ± 4.2  | v - L |
| Red.  | R9                  | 24  | Herb   | 68.8 ± 7.5 | D - M | 82.8 ± 1.6  | a - r | 52.7 ± 8.9  | x - N |
| Red.  | R9                  | 24  | Legume | 83.3 ± 1.3 | d - w | 80.2 ± 1.0  | d - u | 70.6 ± 2.8  | c - u |
| Red.  | R10                 | 19  | Grass  | 70.1 ± 5.0 | B - K | 74.9 ± 1.9  | p - D | 49.1 ± 2.3  | A - O |
| Red.  | R10                 | 19  | Herb   | 58.5 ± 6.2 | N - S | 75.7 ± 3.3  | m - B | 57.1 ± 11.4 | p - J |
| Red.  | R10                 | 19  | Legume | 79.4 ± 3.7 | l - C | 78.0 ± 3.2  | h - z | 58.7 ± 4.6  | o - G |
| Red.  | R11                 | 15  | Grass  | 62.8 ± 4.7 | I - Q | 68.5 ± 0.7  | y - I | 45.3 ± 3.2  | E - P |
| Red.  | R11                 | 15  | Herb   | 61.6 ± 7.2 | J - R | 77.2 ± 6.1  | j - z | 53.1 ± 5.9  | x - N |
| Red.  | R11                 | 15  | Legume | 74.6 ± 3.9 | u - H | 75.5 ± 2.7  | n - B | 60.4 ± 3.2  | m - E |
| Red.  | R12                 | 12  | Grass  | 58.7 ± 2.2 | N - S | 65.7 ± 3.3  | C - K | 38.3 ± 4.0  | N - P |
| Red.  | R12                 | 12  | Herb   | 47.0 ± 7.2 | U - V | 68.3 ± 5.0  | z - I | 51.2 ± 11.1 | y - O |
| Red.  | R12                 | 12  | Legume | 73.4 ± 4.0 | w - H | 69.1 ± 5.1  | x - H | 46.8 ± 5.4  | B - P |
| Red.  | R13                 | 9   | Grass  | 47.8 ± 5.5 | T - V | 59.7 ± 2.5  | H - M | 36.9 ± 4.5  | O - P |
| Red.  | R13                 | 9   | Herb   | 23.1 ± 3.7 | X     | 57.1 ± 10.9 | K - N | 38.4 ± 10.2 | M - P |
| Red.  | R13                 | 9   | Legume | 69.5 ± 4.9 | C - L | 73.4 ± 7.5  | q - E | 48.1 ± 4.1  | B - O |

**Table S3.** Final dataset as a function of seasonal cut, location, species group, and plant part. Locations: G = Raumberg–Gumpenstein, pure grass and legume stands; K1 = Pottenstein, intensively used grass-clover-mixture, rather wet soil; K2 = Pottenstein, intensively used grassland, relatively dry area; K3 = Pottenstein, extensively used meadow, relatively dry and hilly. Source: Supplements of Britz *et al.* [10] (modified).

| Date           | Seasonal Cut | Location | Species Group | Plant Part | Samples | Pixels |
|----------------|--------------|----------|---------------|------------|---------|--------|
| 05.06.2019     | 1            | G        | Grass         | Flower     | 52      | 5179   |
| 05.06.2019     | 1            | G        | Grass         | Leaf       | 66      | 6579   |
| 05.06.2019     | 1            | G        | Grass         | Stem       | 66      | 6575   |
| 05.06.2019     | 1            | G        | Legume        | Flower     | 11      | 1095   |
| 05.06.2019     | 1            | G        | Legume        | Leaf       | 32      | 3195   |
| 05.06.2019     | 1            | G        | Legume        | Stem       | 36      | 3577   |
| 08.07.2019     | 2            | K1       | Grass         | Flower     | 19      | 1898   |
| 08.07.2019     | 2            | K1       | Grass         | Leaf       | 20      | 1996   |
| 08.07.2019     | 2            | K1       | Grass         | Stem       | 2       | 199    |
| 08.07.2019     | 2            | K1       | Herb          | Flower     | 20      | 1999   |
| 08.07.2019     | 2            | K1       | Herb          | Leaf       | 22      | 2199   |
| 08.07.2019     | 2            | K1       | Herb          | Stem       | 16      | 1587   |
| 08.07.2019     | 2            | K1       | Legume        | Flower     | 26      | 2599   |
| 08.07.2019     | 2            | K1       | Legume        | Leaf       | 35      | 3490   |
| 08.07.2019     | 2            | K1       | Legume        | Stem       | 27      | 2670   |
| 08.07.2019     | 2            | K2       | Grass         | Flower     | 44      | 4391   |
| 08.07.2019     | 2            | K2       | Grass         | Leaf       | 10      | 996    |
| 08.07.2019     | 2            | K2       | Grass         | Stem       | 31      | 3088   |
| 08.07.2019     | 2            | K2       | Herb          | Flower     | 17      | 1697   |
| 08.07.2019     | 2            | K2       | Herb          | Leaf       | 14      | 1397   |
| 08.07.2019     | 2            | K2       | Herb          | Stem       | 14      | 1396   |
| 08.07.2019     | 2            | K2       | Legume        | Flower     | 8       | 798    |
| 08.07.2019     | 2            | K2       | Legume        | Leaf       | 10      | 999    |
| 08.07.2019     | 2            | K2       | Legume        | Stem       | 20      | 1995   |
| 23.07.2019     | 2            | G        | Grass         | Flower     | 84      | 8386   |
| 23.07.2019     | 2            | G        | Grass         | Leaf       | 207     | 20632  |
| 23.07.2019     | 2            | G        | Grass         | Stem       | 119     | 11855  |
| 23.07.2019     | 2            | G        | Legume        | Flower     | 60      | 5986   |
| 23.07.2019     | 2            | G        | Legume        | Leaf       | 58      | 5772   |
| 23.07.2019     | 2            | G        | Legume        | Stem       | 65      | 6468   |
| 28.08.2019     | 3            | K1       | Grass         | Leaf       | 25      | 2496   |
| 28.08.2019     | 3            | K1       | Grass         | Stem       | 1       | 100    |
| 28.08.2019     | 3            | K1       | Herb          | Leaf       | 32      | 3200   |
| 28.08.2019     | 3            | K1       | Herb          | Stem       | 19      | 1892   |
| 28.08.2019     | 3            | K1       | Legume        | Leaf       | 35      | 3491   |
| 28.08.2019     | 3            | K1       | Legume        | Stem       | 36      | 3585   |
| 28.08.2019     | 3            | K2       | Grass         | Flower     | 4       | 400    |
| 28.08.2019     | 3            | K2       | Grass         | Leaf       | 27      | 2696   |
| 28.08.2019     | 3            | K2       | Grass         | Stem       | 6       | 599    |
| 28.08.2019     | 3            | K2       | Herb          | Leaf       | 28      | 2793   |
| 28.08.2019     | 3            | K2       | Herb          | Stem       | 6       | 599    |
| 28.08.2019     | 3            | K2       | Legume        | Leaf       | 9       | 899    |
| 28.08.2019     | 3            | K2       | Legume        | Stem       | 9       | 896    |
| 29.08.2019     | 3            | K3       | Herb          | Flower     | 20      | 1993   |
| 29.08.2019     | 3            | K3       | Herb          | Leaf       | 55      | 5496   |
| 29.08.2019     | 3            | K3       | Herb          | Stem       | 35      | 3492   |
| 29.08.2019     | 3            | K3       | Legume        | Flower     | 16      | 1593   |
| 29.08.2019     | 3            | K3       | Legume        | Leaf       | 28      | 2758   |
| 29.08.2019     | 3            | K3       | Legume        | Stem       | 28      | 2789   |
| 12.09.2019     | 3            | G        | Grass         | Flower     | 55      | 5478   |
| 12.09.2019     | 3            | G        | Grass         | Leaf       | 212     | 21112  |
| 12.09.2019     | 3            | G        | Grass         | Stem       | 35      | 3473   |
| 12.09.2019     | 3            | G        | Legume        | Flower     | 37      | 3685   |
| 12.09.2019     | 3            | G        | Legume        | Leaf       | 68      | 6775   |
| 12.09.2019     | 3            | G        | Legume        | Stem       | 45      | 4453   |
| 03.-04.06.2020 | 1            | G        | Grass         | Flower     | 399     | 39764  |
| 03.-04.06.2020 | 1            | G        | Grass         | Leaf       | 441     | 44017  |
| 03.-04.06.2020 | 1            | G        | Grass         | Stem       | 422     | 42087  |
| 03.-04.06.2020 | 1            | G        | Legume        | Flower     | 55      | 5498   |
| 03.-04.06.2020 | 1            | G        | Legume        | Leaf       | 118     | 11796  |

---

|                |   |   |        |        |      |        |
|----------------|---|---|--------|--------|------|--------|
| 03.-04.06.2020 | 1 | G | Legume | Stem   | 92   | 9186   |
| 29.07.2020     | 2 | G | Grass  | Leaf   | 239  | 23864  |
| 29.07.2020     | 2 | G | Legume | Flower | 52   | 5193   |
| 29.07.2020     | 2 | G | Legume | Leaf   | 88   | 8798   |
| 29.07.2020     | 2 | G | Legume | Stem   | 93   | 9285   |
| 21.-23.09.2020 | 3 | G | Grass  | Flower | 169  | 16868  |
| 21.-23.09.2020 | 3 | G | Grass  | Leaf   | 726  | 72541  |
| 21.-23.09.2020 | 3 | G | Grass  | Stem   | 196  | 19596  |
| 21.-23.09.2020 | 3 | G | Legume | Flower | 133  | 13288  |
| 21.-23.09.2020 | 3 | G | Legume | Leaf   | 247  | 24689  |
| 21.-23.09.2020 | 3 | G | Legume | Stem   | 216  | 21574  |
|                |   |   |        |        | 5768 | 575480 |

---

**Table S4.** Species definitely included in the dataset. For herbs, only the genus was determined. At VetFarm additional species might have been sampled. Source: Supplements of Britz *et al.* [10] (modified).

| Species Group | Species                                                                                                                                                                                                                                                                                                                                                                                                                                                                                                                                                                                                                                             |
|---------------|-----------------------------------------------------------------------------------------------------------------------------------------------------------------------------------------------------------------------------------------------------------------------------------------------------------------------------------------------------------------------------------------------------------------------------------------------------------------------------------------------------------------------------------------------------------------------------------------------------------------------------------------------------|
| Grass         | <i>Agrostis capillaris</i> L., <i>Agrostis gigantea</i> Roth, <i>Alopecurus pratensis</i> L., <i>Arrhenatherum elatius</i> (L.) P.Beauv. ex J.Presl & C.Presl, <i>Bromus erectus</i> Huds., <i>Cynosurus cristatus</i> L., <i>Dactylis glomerata</i> L., <i>Deschampsia cespitosa</i> (L.) P. Beauv., <i>Elymus repens</i> (L.) Gould, <i>Festuca ovina</i> agg. L., <i>Festuca pratensis</i> Huds., <i>Festuca rubra</i> agg. L., <i>Lolium hybridum</i> Hausskn., <i>Lolium multiflorum</i> Lam., <i>Lolium perenne</i> L., <i>Poa trivialis</i> L., <i>Poa pratensis</i> L., <i>Phleum pratense</i> L., <i>Trisetum flavescens</i> (L.) P.Beauv. |
| Herb          | <i>Achillea</i> L., <i>Cirsium</i> Mill., <i>Leucanthemum</i> Mill., <i>Plantago</i> L., <i>Rumex</i> L., <i>Taraxacum</i> F.H. Wigg.                                                                                                                                                                                                                                                                                                                                                                                                                                                                                                               |
| Legume        | <i>Lotus corniculatus</i> L., <i>Medicago sativa</i> L., <i>Trifolium hybridum</i> L., <i>Trifolium pratense</i> L., <i>Trifolium repens</i> L.                                                                                                                                                                                                                                                                                                                                                                                                                                                                                                     |

**Table S5.** Hyperspectral camera (Specim Fx10) predictor info. ID = spectral band number, L = lower input predictor, H = higher input predictor, D = name of derived predictor. The unit of all predictor values is nm. L and H are presented with bandwidth defined by the full width at half maximum.

| ID | L             | H             | D   | ID  | L             | H             | D   | ID  | L             | H             | D   |
|----|---------------|---------------|-----|-----|---------------|---------------|-----|-----|---------------|---------------|-----|
| 1  | 440.43 ± 1.31 | 443.05 ± 1.31 | 442 | 65  | 610.09 ± 1.34 | 612.77 ± 1.34 | 611 | 129 | 783.51 ± 1.37 | 786.25 ± 1.37 | 785 |
| 2  | 443.05 ± 1.31 | 445.68 ± 1.31 | 444 | 66  | 612.77 ± 1.34 | 615.45 ± 1.34 | 614 | 130 | 786.25 ± 1.37 | 788.99 ± 1.37 | 788 |
| 3  | 445.68 ± 1.31 | 448.30 ± 1.31 | 447 | 67  | 615.45 ± 1.34 | 618.13 ± 1.34 | 617 | 131 | 788.99 ± 1.37 | 791.73 ± 1.37 | 790 |
| 4  | 448.30 ± 1.31 | 450.92 ± 1.31 | 450 | 68  | 618.13 ± 1.34 | 620.81 ± 1.34 | 619 | 132 | 791.73 ± 1.37 | 794.47 ± 1.37 | 793 |
| 5  | 450.92 ± 1.31 | 453.55 ± 1.31 | 452 | 69  | 620.81 ± 1.34 | 623.50 ± 1.34 | 622 | 133 | 794.47 ± 1.37 | 797.21 ± 1.37 | 796 |
| 6  | 453.55 ± 1.31 | 456.18 ± 1.31 | 455 | 70  | 623.50 ± 1.34 | 626.18 ± 1.34 | 625 | 134 | 797.21 ± 1.37 | 799.96 ± 1.37 | 799 |
| 7  | 456.18 ± 1.31 | 458.80 ± 1.31 | 457 | 71  | 626.18 ± 1.34 | 628.87 ± 1.34 | 628 | 135 | 799.96 ± 1.37 | 802.70 ± 1.38 | 801 |
| 8  | 458.80 ± 1.31 | 461.43 ± 1.31 | 460 | 72  | 628.87 ± 1.34 | 631.56 ± 1.34 | 630 | 136 | 802.70 ± 1.38 | 805.45 ± 1.38 | 804 |
| 9  | 461.43 ± 1.31 | 464.06 ± 1.31 | 463 | 73  | 631.56 ± 1.34 | 634.25 ± 1.34 | 633 | 137 | 805.45 ± 1.38 | 808.20 ± 1.38 | 807 |
| 10 | 464.06 ± 1.31 | 466.69 ± 1.31 | 465 | 74  | 634.25 ± 1.34 | 636.93 ± 1.34 | 636 | 138 | 808.20 ± 1.38 | 810.94 ± 1.38 | 810 |
| 11 | 466.69 ± 1.31 | 469.32 ± 1.31 | 468 | 75  | 636.93 ± 1.34 | 639.62 ± 1.34 | 638 | 139 | 810.94 ± 1.38 | 813.69 ± 1.38 | 812 |
| 12 | 469.32 ± 1.31 | 471.95 ± 1.31 | 471 | 76  | 639.62 ± 1.34 | 642.31 ± 1.34 | 641 | 140 | 813.69 ± 1.38 | 816.44 ± 1.38 | 815 |
| 13 | 471.95 ± 1.31 | 474.59 ± 1.31 | 473 | 77  | 642.31 ± 1.34 | 645.01 ± 1.34 | 644 | 141 | 816.44 ± 1.38 | 819.19 ± 1.38 | 818 |
| 14 | 474.59 ± 1.31 | 477.22 ± 1.31 | 476 | 78  | 645.01 ± 1.34 | 647.70 ± 1.34 | 646 | 142 | 819.19 ± 1.38 | 821.95 ± 1.38 | 821 |
| 15 | 477.22 ± 1.31 | 479.86 ± 1.31 | 479 | 79  | 647.70 ± 1.34 | 650.39 ± 1.34 | 649 | 143 | 821.95 ± 1.38 | 824.70 ± 1.38 | 823 |
| 16 | 479.86 ± 1.31 | 482.49 ± 1.32 | 481 | 80  | 650.39 ± 1.34 | 653.09 ± 1.34 | 652 | 144 | 824.70 ± 1.38 | 827.45 ± 1.38 | 826 |
| 17 | 482.49 ± 1.32 | 485.13 ± 1.32 | 484 | 81  | 653.09 ± 1.34 | 655.78 ± 1.35 | 654 | 145 | 827.45 ± 1.38 | 830.21 ± 1.38 | 829 |
| 18 | 485.13 ± 1.32 | 487.77 ± 1.32 | 486 | 82  | 655.78 ± 1.35 | 658.48 ± 1.35 | 657 | 146 | 830.21 ± 1.38 | 832.96 ± 1.38 | 832 |
| 19 | 487.77 ± 1.32 | 490.40 ± 1.32 | 489 | 83  | 658.48 ± 1.35 | 661.18 ± 1.35 | 660 | 147 | 832.96 ± 1.38 | 835.72 ± 1.38 | 834 |
| 20 | 490.40 ± 1.32 | 493.04 ± 1.32 | 492 | 84  | 661.18 ± 1.35 | 663.87 ± 1.35 | 663 | 148 | 835.72 ± 1.38 | 838.47 ± 1.38 | 837 |
| 21 | 493.04 ± 1.32 | 495.68 ± 1.32 | 494 | 85  | 663.87 ± 1.35 | 666.57 ± 1.35 | 665 | 149 | 838.47 ± 1.38 | 841.23 ± 1.38 | 840 |
| 22 | 495.68 ± 1.32 | 498.33 ± 1.32 | 497 | 86  | 666.57 ± 1.35 | 669.27 ± 1.35 | 668 | 150 | 841.23 ± 1.38 | 843.99 ± 1.38 | 843 |
| 23 | 498.33 ± 1.32 | 500.97 ± 1.32 | 500 | 87  | 669.27 ± 1.35 | 671.97 ± 1.35 | 671 | 151 | 843.99 ± 1.38 | 846.75 ± 1.38 | 845 |
| 24 | 500.97 ± 1.32 | 503.61 ± 1.32 | 502 | 88  | 671.97 ± 1.35 | 674.68 ± 1.35 | 673 | 152 | 846.75 ± 1.38 | 849.51 ± 1.38 | 848 |
| 25 | 503.61 ± 1.32 | 506.25 ± 1.32 | 505 | 89  | 674.68 ± 1.35 | 677.38 ± 1.35 | 676 | 153 | 849.51 ± 1.38 | 852.27 ± 1.38 | 851 |
| 26 | 506.25 ± 1.32 | 508.90 ± 1.32 | 508 | 90  | 677.38 ± 1.35 | 680.08 ± 1.35 | 679 | 154 | 852.27 ± 1.38 | 855.04 ± 1.38 | 854 |
| 27 | 508.90 ± 1.32 | 511.54 ± 1.32 | 510 | 91  | 680.08 ± 1.35 | 682.79 ± 1.35 | 681 | 155 | 855.04 ± 1.38 | 857.80 ± 1.38 | 856 |
| 28 | 511.54 ± 1.32 | 514.19 ± 1.32 | 513 | 92  | 682.79 ± 1.35 | 685.49 ± 1.35 | 684 | 156 | 857.80 ± 1.38 | 860.56 ± 1.38 | 859 |
| 29 | 514.19 ± 1.32 | 516.84 ± 1.32 | 516 | 93  | 685.49 ± 1.35 | 688.20 ± 1.35 | 687 | 157 | 860.56 ± 1.38 | 863.33 ± 1.39 | 862 |
| 30 | 516.84 ± 1.32 | 519.49 ± 1.32 | 518 | 94  | 688.20 ± 1.35 | 690.91 ± 1.35 | 690 | 158 | 863.33 ± 1.39 | 866.10 ± 1.39 | 865 |
| 31 | 519.49 ± 1.32 | 522.14 ± 1.32 | 521 | 95  | 690.91 ± 1.35 | 693.62 ± 1.35 | 692 | 159 | 866.10 ± 1.39 | 868.86 ± 1.39 | 867 |
| 32 | 522.14 ± 1.32 | 524.79 ± 1.32 | 523 | 96  | 693.62 ± 1.35 | 696.33 ± 1.35 | 695 | 160 | 868.86 ± 1.39 | 871.63 ± 1.39 | 870 |
| 33 | 524.79 ± 1.32 | 527.44 ± 1.32 | 526 | 97  | 696.33 ± 1.35 | 699.04 ± 1.35 | 698 | 161 | 871.63 ± 1.39 | 874.40 ± 1.39 | 873 |
| 34 | 527.44 ± 1.32 | 530.09 ± 1.32 | 529 | 98  | 699.04 ± 1.35 | 701.75 ± 1.35 | 700 | 162 | 874.40 ± 1.39 | 877.17 ± 1.39 | 876 |
| 35 | 530.09 ± 1.32 | 532.74 ± 1.32 | 531 | 99  | 701.75 ± 1.35 | 704.46 ± 1.35 | 703 | 163 | 877.17 ± 1.39 | 879.94 ± 1.39 | 879 |
| 36 | 532.74 ± 1.32 | 535.40 ± 1.32 | 534 | 100 | 704.46 ± 1.35 | 707.17 ± 1.35 | 706 | 164 | 879.94 ± 1.39 | 882.71 ± 1.39 | 881 |
| 37 | 535.40 ± 1.32 | 538.05 ± 1.32 | 537 | 101 | 707.17 ± 1.35 | 709.89 ± 1.35 | 709 | 165 | 882.71 ± 1.39 | 885.49 ± 1.39 | 884 |
| 38 | 538.05 ± 1.32 | 540.71 ± 1.33 | 539 | 102 | 709.89 ± 1.35 | 712.60 ± 1.35 | 711 | 166 | 885.49 ± 1.39 | 888.26 ± 1.39 | 887 |
| 39 | 540.71 ± 1.33 | 543.37 ± 1.33 | 542 | 103 | 712.60 ± 1.35 | 715.32 ± 1.36 | 714 | 167 | 888.26 ± 1.39 | 891.03 ± 1.39 | 890 |
| 40 | 543.37 ± 1.33 | 546.02 ± 1.33 | 545 | 104 | 715.32 ± 1.36 | 718.03 ± 1.36 | 717 | 168 | 891.03 ± 1.39 | 893.81 ± 1.39 | 892 |
| 41 | 546.02 ± 1.33 | 548.68 ± 1.33 | 547 | 105 | 718.03 ± 1.36 | 720.75 ± 1.36 | 719 | 169 | 893.81 ± 1.39 | 896.59 ± 1.39 | 895 |
| 42 | 548.68 ± 1.33 | 551.34 ± 1.33 | 550 | 106 | 720.75 ± 1.36 | 723.47 ± 1.36 | 722 | 170 | 896.59 ± 1.39 | 899.36 ± 1.39 | 898 |
| 43 | 551.34 ± 1.33 | 554.00 ± 1.33 | 553 | 107 | 723.47 ± 1.36 | 726.19 ± 1.36 | 725 | 171 | 899.36 ± 1.39 | 902.14 ± 1.39 | 901 |
| 44 | 554.00 ± 1.33 | 556.66 ± 1.33 | 555 | 108 | 726.19 ± 1.36 | 728.91 ± 1.36 | 728 | 172 | 902.14 ± 1.39 | 904.92 ± 1.39 | 904 |
| 45 | 556.66 ± 1.33 | 559.33 ± 1.33 | 558 | 109 | 728.91 ± 1.36 | 731.63 ± 1.36 | 730 | 173 | 904.92 ± 1.39 | 907.70 ± 1.39 | 906 |
| 46 | 559.33 ± 1.33 | 561.99 ± 1.33 | 561 | 110 | 731.63 ± 1.36 | 734.35 ± 1.36 | 733 | 174 | 907.70 ± 1.39 | 910.48 ± 1.39 | 909 |
| 47 | 561.99 ± 1.33 | 564.65 ± 1.33 | 563 | 111 | 734.35 ± 1.36 | 737.07 ± 1.36 | 736 | 175 | 910.48 ± 1.39 | 913.26 ± 1.39 | 912 |
| 48 | 564.65 ± 1.33 | 567.32 ± 1.33 | 566 | 112 | 737.07 ± 1.36 | 739.80 ± 1.36 | 738 | 176 | 913.26 ± 1.39 | 916.05 ± 1.39 | 915 |
| 49 | 567.32 ± 1.33 | 569.98 ± 1.33 | 569 | 113 | 739.80 ± 1.36 | 742.52 ± 1.36 | 741 | 177 | 916.05 ± 1.39 | 918.83 ± 1.39 | 917 |
| 50 | 569.98 ± 1.33 | 572.65 ± 1.33 | 571 | 114 | 742.52 ± 1.36 | 745.25 ± 1.36 | 744 | 178 | 918.83 ± 1.39 | 921.62 ± 1.39 | 920 |
| 51 | 572.65 ± 1.33 | 575.32 ± 1.33 | 574 | 115 | 745.25 ± 1.36 | 747.98 ± 1.36 | 747 | 179 | 921.62 ± 1.39 | 924.40 ± 1.40 | 923 |
| 52 | 575.32 ± 1.33 | 577.99 ± 1.33 | 577 | 116 | 747.98 ± 1.36 | 750.70 ± 1.36 | 749 | 180 | 924.40 ± 1.40 | 927.19 ± 1.40 | 926 |
| 53 | 577.99 ± 1.33 | 580.66 ± 1.33 | 579 | 117 | 750.70 ± 1.36 | 753.43 ± 1.36 | 752 | 181 | 927.19 ± 1.40 | 929.97 ± 1.40 | 929 |
| 54 | 580.66 ± 1.33 | 583.33 ± 1.33 | 582 | 118 | 753.43 ± 1.36 | 756.16 ± 1.36 | 755 | 182 | 929.97 ± 1.40 | 932.76 ± 1.40 | 931 |
| 55 | 583.33 ± 1.33 | 586.00 ± 1.33 | 585 | 119 | 756.16 ± 1.36 | 758.89 ± 1.36 | 758 | 183 | 932.76 ± 1.40 | 935.55 ± 1.40 | 934 |
| 56 | 586.00 ± 1.33 | 588.67 ± 1.33 | 587 | 120 | 758.89 ± 1.36 | 761.62 ± 1.36 | 760 | 184 | 935.55 ± 1.40 | 938.34 ± 1.40 | 937 |
| 57 | 588.67 ± 1.33 | 591.35 ± 1.33 | 590 | 121 | 761.62 ± 1.36 | 764.36 ± 1.36 | 763 | 185 | 938.34 ± 1.40 | 941.13 ± 1.40 | 940 |
| 58 | 591.35 ± 1.33 | 594.02 ± 1.33 | 593 | 122 | 764.36 ± 1.36 | 767.09 ± 1.36 | 766 | 186 | 941.13 ± 1.40 | 943.93 ± 1.40 | 943 |
| 59 | 594.02 ± 1.33 | 596.70 ± 1.34 | 595 | 123 | 767.09 ± 1.36 | 769.82 ± 1.36 | 768 | 187 | 943.93 ± 1.40 | 946.72 ± 1.40 | 945 |
| 60 | 596.70 ± 1.34 | 599.37 ± 1.34 | 598 | 124 | 769.82 ± 1.36 | 772.56 ± 1.37 | 771 | 188 | 946.72 ± 1.40 | 949.51 ± 1.40 | 948 |
| 61 | 599.37 ± 1.34 | 602.05 ± 1.34 | 601 | 125 | 772.56 ± 1.37 | 775.29 ± 1.37 | 774 | 189 | 949.51 ± 1.40 | 952.31 ± 1.40 | 951 |
| 62 | 602.05 ± 1.34 | 604.73 ± 1.34 | 603 | 126 | 775.29 ± 1.37 | 778.03 ± 1.37 | 777 | 190 | 952.31 ± 1.40 | 955.10 ± 1.40 | 954 |
| 63 | 604.73 ± 1.34 | 607.41 ± 1.34 | 606 | 127 | 778.03 ± 1.37 | 780.77 ± 1.37 | 779 | 191 | 955.10 ± 1.40 | 957.90 ± 1.40 | 956 |
| 64 | 607.41 ± 1.34 | 610.09 ± 1.34 | 609 | 128 | 780.77 ± 1.37 | 783.51 ± 1.37 | 782 |     |               |               |     |



**Table S6.** Hyperparameter search space used to find hyperparameter combinations, delivering high multilayer perceptron model accuracy on the validation dataset. L1 and L2 = number of nodes in first and second hidden layer, respectively. LR = learning rate.

| Parameter    | Accepted Values                                              |
|--------------|--------------------------------------------------------------|
| L1           | 10–100 with increments of 10, 100–1000 with increments of 50 |
| L2           | 10–100 with increments of 10, 100–1000 with increments of 50 |
| LR           | $1 \times 10^{-1}$ to $1 \times 10^{-4}$                     |
| batch size   | 4, 8, 16, 32, 64, 128, 256, 512                              |
| weight decay | $1 \times 10^{-4}$                                           |
| momentum     | 0.9                                                          |

**Table S7.** Hyperparameter combinations used for cross-validated multilayer perceptron training. IS = input size, BS = batch size, L1 and L2 = number of nodes in first and second hidden layer, respectively. LR = learning rate. Variants with the postfix “-O” were processed without Savitzky–Golay filtering and derivation.

| Approach | Variant                  | IS  | BS  | LR      | L1   | L2   |
|----------|--------------------------|-----|-----|---------|------|------|
| Ref.     | Baseline                 | 191 | 128 | 0.00668 | 900  | 600  |
| Ref.     | Baseline-O               | 192 | 16  | 0.00026 | 90   | 600  |
| Ref.     | Even bands               | 96  | 32  | 0.00115 | 800  | 900  |
| Ref.     | Odd bands                | 95  | 256 | 0.01654 | 950  | 400  |
| Ref.     | DCS                      | 9   | 256 | 0.01444 | 50   | 450  |
| Ref.     | DCS-O                    | 10  | 64  | 0.00027 | 800  | 400  |
| Ref.     | Sentinal                 | 9   | 256 | 0.01444 | 50   | 450  |
| Ref.     | Sentinal-O               | 10  | 128 | 0.00074 | 1000 | 600  |
| ANOVA    | $D \geq 33 / 36$         | 144 | 16  | 0.00081 | 950  | 950  |
| ANOVA    | $D \geq 34 / 36$         | 119 | 32  | 0.00183 | 250  | 950  |
| ANOVA    | $D \geq 35 / 36$         | 87  | 32  | 0.00194 | 750  | 700  |
| ANOVA    | $D = 36 / 36$            | 34  | 512 | 0.02181 | 750  | 1000 |
| ANOVA    | $D = 36 / 36, C \leq 95$ | 31  | 256 | 0.01761 | 600  | 800  |
| ANOVA    | $D = 36 / 36, C \leq 85$ | 29  | 32  | 0.00260 | 700  | 700  |
| ANOVA    | $D = 36 / 36, C \leq 75$ | 21  | 256 | 0.02564 | 400  | 850  |
| ANOVA    | $D = 36 / 36, C \leq 65$ | 17  | 8   | 0.00031 | 1000 | 350  |
| ANOVA    | $D = 36 / 36, C \leq 55$ | 12  | 8   | 0.00050 | 350  | 750  |
| ANOVA    | $D = 36 / 36, C \leq 45$ | 10  | 4   | 0.00094 | 600  | 200  |
| Peak     | Top 30 per class         | 103 | 64  | 0.01039 | 700  | 650  |
| Peak     | Top 25 per class         | 95  | 256 | 0.03298 | 850  | 1000 |
| Peak     | Top 20 per class         | 83  | 64  | 0.00588 | 900  | 400  |
| Peak     | Top 15 per class         | 63  | 128 | 0.00702 | 700  | 1000 |
| Peak     | Top 10 per class         | 42  | 64  | 0.00444 | 850  | 700  |
| Peak     | Top 7 per class          | 30  | 256 | 0.01120 | 600  | 800  |
| Peak     | Top 5 per class          | 22  | 32  | 0.00141 | 600  | 550  |
| Peak     | Top 3 per class          | 14  | 128 | 0.01031 | 750  | 300  |
| Peak     | Ignoring classes         | 22  | 8   | 0.00050 | 350  | 750  |
| Red.     | R1                       | 152 | 32  | 0.00231 | 350  | 1000 |
| Red.     | R2                       | 121 | 64  | 0.00167 | 300  | 700  |
| Red.     | R3                       | 96  | 64  | 0.00077 | 850  | 600  |
| Red.     | R4                       | 76  | 64  | 0.00175 | 500  | 950  |
| Red.     | R5                       | 60  | 256 | 0.01127 | 1000 | 600  |
| Red.     | R6                       | 48  | 32  | 0.00127 | 650  | 900  |
| Red.     | R7                       | 38  | 64  | 0.00077 | 850  | 600  |
| Red.     | R8                       | 30  | 32  | 0.00183 | 250  | 950  |
| Red.     | R9                       | 24  | 16  | 0.00052 | 850  | 450  |
| Red.     | R10                      | 19  | 16  | 0.00095 | 650  | 500  |
| Red.     | R11                      | 15  | 32  | 0.00052 | 350  | 1000 |
| Red.     | R12                      | 12  | 32  | 0.00183 | 250  | 950  |
| Red.     | R13                      | 9   | 8   | 0.00050 | 350  | 750  |

**Table S8.** Mean classification accuracy (MCA) and weighted F1 score (F1) based on the reduction variants, calculated directly from the baseline variant IGs without retraining (Method B) and reduction approach variants (Method I). V = Variant. Method = M. Input size = IS. Statistical significance was calculated for MCA and F1 in a joint analysis ( $\alpha = 5\%$ ). Significance letters are given in alphabetical ranges. Upper case letters follow lower case letters. All letters enclosed in the ranges belong to the same significance group. Different letters denote significant differences. Values with standard deviation, 5-fold cross-validated.

| V   | M | I   | MCA [%]        | Stat. sig. | F1 [%]         | Stat. sig. |
|-----|---|-----|----------------|------------|----------------|------------|
| R1  | B | 152 | 85.3 $\pm$ 0.6 | a          | 85.3 $\pm$ 0.6 | a          |
| R1  | I | 152 | 85.2 $\pm$ 0.6 | a          | 85.3 $\pm$ 0.6 | a          |
| R2  | B | 121 | 84.6 $\pm$ 0.9 | ab         | 84.6 $\pm$ 1.0 | ab         |
| R2  | I | 121 | 84.8 $\pm$ 0.5 | ab         | 84.8 $\pm$ 0.6 | ab         |
| R3  | B | 96  | 84.1 $\pm$ 0.5 | ab         | 84.1 $\pm$ 0.5 | ab         |
| R3  | I | 96  | 83.9 $\pm$ 0.7 | ab         | 84.0 $\pm$ 0.6 | ab         |
| R4  | B | 76  | 82.9 $\pm$ 0.6 | bc         | 83.0 $\pm$ 0.5 | bc         |
| R4  | I | 76  | 83.2 $\pm$ 0.7 | bc         | 83.2 $\pm$ 0.5 | bc         |
| R5  | B | 60  | 80.8 $\pm$ 0.3 | de         | 81.0 $\pm$ 0.2 | de         |
| R5  | I | 60  | 81.4 $\pm$ 0.7 | cde        | 81.6 $\pm$ 0.7 | cd         |
| R6  | B | 48  | 79.6 $\pm$ 0.4 | efgh       | 79.9 $\pm$ 0.4 | defg       |
| R6  | I | 48  | 79.9 $\pm$ 0.6 | defg       | 80.1 $\pm$ 0.5 | def        |
| R7  | B | 38  | 77.8 $\pm$ 0.7 | hi         | 78.2 $\pm$ 0.6 | fgh        |
| R7  | I | 38  | 77.8 $\pm$ 0.6 | hi         | 78.0 $\pm$ 0.4 | gh         |
| R8  | B | 30  | 75.4 $\pm$ 0.6 | jk         | 75.9 $\pm$ 0.5 | ij         |
| R8  | I | 30  | 75.4 $\pm$ 0.7 | jk         | 75.9 $\pm$ 0.5 | ij         |
| R9  | B | 24  | 72.6 $\pm$ 0.8 | l          | 73.2 $\pm$ 0.6 | l          |
| R9  | I | 24  | 73.1 $\pm$ 1.0 | l          | 73.6 $\pm$ 1.0 | kl         |
| R10 | B | 19  | 65.3 $\pm$ 0.4 | n          | 66.2 $\pm$ 0.4 | n          |
| R10 | I | 19  | 68.7 $\pm$ 0.8 | m          | 69.3 $\pm$ 0.6 | m          |
| R11 | B | 15  | 60.3 $\pm$ 0.8 | op         | 61.3 $\pm$ 0.7 | o          |
| R11 | I | 15  | 64.4 $\pm$ 0.5 | n          | 65.3 $\pm$ 0.4 | n          |
| R12 | B | 12  | 56.5 $\pm$ 1.1 | rs         | 57.2 $\pm$ 0.8 | qr         |
| R12 | I | 12  | 58.9 $\pm$ 0.9 | pq         | 60.0 $\pm$ 0.8 | op         |
| R13 | B | 9   | 54.5 $\pm$ 2.1 | t          | 55.3 $\pm$ 1.9 | rst        |
| R13 | I | 9   | 54.8 $\pm$ 0.3 | st         | 55.4 $\pm$ 0.6 | rst        |
